# Supplementary material for: Abnormal Cannabidiol Affects Production of Pro-Inflammatory Mediators and Astrocyte Wound Closure in Primary Astrocytic-Microglial Cocultures
Source: MDPI journal article supplement (doi:10.3390/molecules25030496), 2020-01-23
Supplement: s1 [file s1]

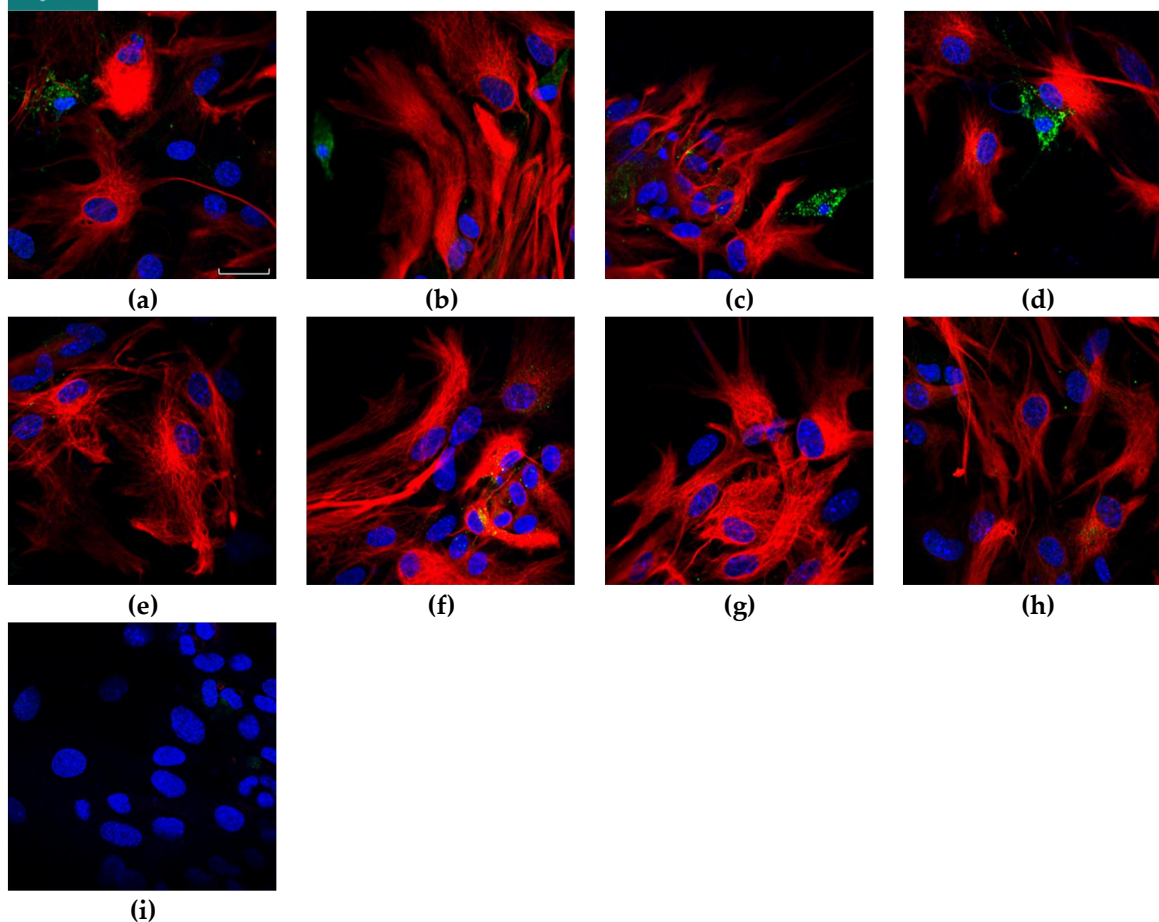

**Figure S1.** Representative images from exemplary immunohistochemistry. Exemplary labeling of GFAP, IB<sub>4</sub> and nuclei in astrocytic-microglial co-cultures (**a-d**) and isolated astrocytes (**e-h**). Red fluorescence points to GFAP-positive astrocytes, green fluorescence to IB<sub>4</sub>-positive microglia, while DAPI-labeled nuclei are blue. The treatment groups CTL (**a, e**), 10  $\mu$ M Abn-CBD (**b, f**), 10 ng/ml LPS (**c, g**) and 10  $\mu$ M Abn-CBD + 10 ng/ml LPS were examined. Negative control (without primary antibody) confirming the specificity of the secondary antibody (**i**). (Scalebar in **(a)** =25  $\mu$ m, all images same scale)
